# Supplementary material for: Genetic Variants on 3q21 and in the Sp8 Transcription Factor Gene (SP8) as Susceptibility Loci for Psychotic Disorders: A Genetic Association Study
Source: PLoS One. 2013 Aug 13;8(8):e70964. doi: 10.1371/journal.pone.0070964 (PMC3742587; doi:10.1371/journal.pone.0070964)
Supplement: Table S2 — Association analysis for all SNPs. (XLSX) [file pone.0070964.s006.xlsx]

## Sheet: Sheet1
CHR	SNP	proxy (original SNP)	GENE	BP	A1	A2	phenotype	F_A	F_U	P	OR	SE	direction
1	rs4660531		FOXO6	41839822	T	G	BD	0.1199	0.1282	0.77495	0.9266	0.101	-
							SCZ	0.1344	0.1282	0.2899	1.056	0.09776	+
							Psychosis	0.1273	0.1282	0.53865	0.9917	0.08621	-
1	rs472913		NF1A	61095558	G	C	BD	0.4847	0.4989	0.1963	0.9448	0.06648	+
							SCZ	0.4693	0.4989	0.036425	0.8884	0.06597	+
							Psychosis	0.4769	0.4989	0.0628	0.9157	0.05751	+
1	rs1780050	yes	NEXN	78173128	T	G	BD	0.4447	0.4571	0.22805	0.9513	0.067	+
		(rs11162405)					SCZ	0.4439	0.4571	0.21025	0.9479	0.06648	+
							Psychosis	0.4443	0.4571	0.18605	0.9495	0.058	+
1	rs12730292		ELTD1	79254762	G	C	BD	0.03728	0.03303	0.75565	1.134	0.1811	-
							SCZ	0.03757	0.03303	0.7714	1.143	0.1793	-
							Psychosis	0.03743	0.03303	0.7935	1.138	0.1581	-
2	rs702891	yes	FLJ16124	65611954	G	C	BD	0.4873	0.4899	0.562	0.9896	0.06669	-
		(rs3845817)					SCZ	0.4968	0.4899	0.33815	1.028	0.06606	+
							Psychosis	0.4922	0.4899	0.4383	1.009	0.05764	+
2	rs7578035		MGAT4A	99382892	G	T	BD	0.2096	0.1976	0.1871	1.076	0.08277	+
							SCZ	0.1921	0.1976	0.66305	0.9655	0.08337	-
							Psychosis	0.2007	0.1976	0.39545	1.019	0.07221	+
2	rs2176528		N/A	194580428	G	C	BD	0.3929	0.3955	0.5626	0.9893	0.06829	-
							SCZ	0.3931	0.3955	0.55955	0.9899	0.06767	-
							Psychosis	0.393	0.3955	0.5702	0.9896	0.05904	-
3	rs6550435		LBA1	36864489	G	T	BD	0.1436	0.1584	0.8923	0.8907	0.09347	-
							SCZ	0.1274	0.1584	0.996342	0.7756	0.09489	-
							Psychosis	0.1353	0.1584	0.98883	0.8314	0.08091	-
3	rs2251219		PBRM1	52584787	A	G	BD	0.4901	0.4519	0.01087	1.166	0.06681	+
							SCZ	0.5	0.4519	0.001764	1.213	0.06617	+
							Psychosis	0.4951	0.4519	0.001331	1.189	0.05779	+
3	rs1042779		ITIH1	52821011	A	G	BD	0.4978	0.4654	0.025475	1.139	0.06655	+
							SCZ	0.5026	0.4654	0.011915	1.161	0.06604	+
							Psychosis	0.5003	0.4654	0.007645	1.15	0.05761	+
3	rs736408		ITIH3	52835354	A	G	BD	0.4495	0.4799	0.033515	0.8849	0.06679	+
							SCZ	0.4463	0.4799	0.020855	0.8738	0.06626	+
							Psychosis	0.4479	0.4799	0.012875	0.8792	0.05773	+
3	rs3774609		CACNA1D	53832903	G	T	BD	0.3757	0.3645	0.7561	1.049	0.06886	-
							SCZ	0.3626	0.3645	0.45055	0.9915	0.06851	+
							Psychosis	0.369	0.3645	0.6264	1.019	0.05968	-
3	rs1386681	yes	EPHA6	97879778	A	G	BD	0.1901	0.1955	0.33855	0.9654	0.0845	+
		(rs1825828)					SCZ	0.214	0.1955	0.91705	1.12	0.08186	-
							Psychosis	0.2023	0.1955	0.7208	1.043	0.0723	-
4	rs17395886		FSTL5	162279385	A	C	BD	0.1927	0.1845	0.73555	1.055	0.08493	-
							SCZ	0.1842	0.1845	0.49175	0.9982	0.08513	+
							Psychosis	0.1884	0.1845	0.63615	1.026	0.07394	-
6	rs9371601		SYNE1	152832266	G	T	BD	0.2212	0.224	0.4205	0.9841	0.08005	+
							SCZ	0.2255	0.224	0.54375	1.009	0.07921	-
							Psychosis	0.2234	0.224	0.48005	0.9965	0.06914	+
6	rs9397512		SYNE1	152847582	C	T	BD	0.2234	0.2212	0.5636	1.013	0.08009	-
							SCZ	0.2243	0.2212	0.5898	1.018	0.07936	-
							Psychosis	0.2238	0.2212	0.5883	1.016	0.0693	-
7	rs10240470	yes	MAD1L1	1916497	G	T	BD	0.1068	0.08511	0.013515	1.285	0.1137	+
		(rs4332037)					SCZ	0.09788	0.08511	0.08985	1.166	0.1148	+
							Psychosis	0.1023	0.08511	0.021905	1.225	0.1006	+
7	rs2709736		SP8	20862302	A	G	BD	0.3053	0.3449	0.00547	0.8347	0.07106	+
							SCZ	0.3143	0.3449	0.024505	0.8707	0.07033	+
							Psychosis	0.3098	0.3449	0.0045665	0.8528	0.0611	+
7	rs2709722		SP8	20867808	T	C	BD	0.3113	0.3503	0.00632	0.8383	0.07076	+
							SCZ	0.3066	0.3503	0.002364	0.82	0.07029	+
							Psychosis	0.3089	0.3503	0.001035	0.829	0.06094	+
8	rs7827290		LOC731779	142300315	G	T	BD	0.1324	0.138	0.68775	0.9535	0.09736	-
							SCZ	0.1333	0.138	0.65995	0.9611	0.09631	-
							Psychosis	0.1329	0.138	0.6984	0.9573	0.08388	-
10	rs11013860		CACNB2	18694033	T	C	BD	0.4619	0.4397	0.09045	1.094	0.06715	+
							SCZ	0.4564	0.4397	0.15445	1.07	0.06656	+
							Psychosis	0.4591	0.4397	0.0882	1.082	0.05812	+
10	rs10994397		ANK3	61949130	T	C	BD	0.4564	0.4411	0.17885	1.064	0.06707	+
							SCZ	0.4633	0.4411	0.0886	1.094	0.06641	+
							Psychosis	0.4599	0.4411	0.09525	1.079	0.058	+
10	rs1938526		ANK3	61970389	C	T	BD	0.4573	0.434	0.08075	1.099	0.06729	+
							SCZ	0.458	0.434	0.0729	1.102	0.06661	+
							Psychosis	0.4577	0.434	0.0503	1.1	0.05821	+
10	rs10994336		ANK3	62179812	T	C	BD	0.362	0.3462	0.1604	1.072	0.06959	+
							SCZ	0.3798	0.3462	0.017215	1.156	0.0687	+
							Psychosis	0.371	0.3462	0.0364	1.114	0.06021	+
11	rs10896135		C11orf80	66551002	C	G	BD	0.129	0.1356	0.2784	0.9439	0.09822	+
							SCZ	0.1532	0.1356	0.9357	1.154	0.09406	-
							Psychosis	0.1413	0.1356	0.71675	1.049	0.08357	-
11	rs12576775		ODZ4	79077193	G	A	BD	0.02303	0.02472	0.6304	0.9299	0.2183	-
							SCZ	0.01907	0.02472	0.87925	0.7669	0.2272	-
							Psychosis	0.02101	0.02472	0.80845	0.8469	0.1908	-
11	rs2175420		ODZ4	79123883	T	C	BD	0.07198	0.0825	0.8819	0.8626	0.1249	-
							SCZ	0.069	0.0825	0.93915	0.8243	0.125	-
							Psychosis	0.07046	0.0825	0.94455	0.8431	0.1072	-
12	rs1006737		CACNA1C	2345295	A	G	BD	0.05404	0.05964	0.76695	0.9007	0.1436	-
							SCZ	0.06515	0.05964	0.2451	1.099	0.1365	+
							Psychosis	0.05968	0.05964	0.498	1.001	0.1214	+
12	rs4765913		CACNA1C	2419896	A	T	BD	0.04421	0.04632	0.61965	0.9525	0.1598	-
							SCZ	0.05074	0.04632	0.2663	1.101	0.1536	+
							Psychosis	0.04753	0.04632	0.42115	1.027	0.1363	+
12	rs7296288		DHH	47766235	C	A	BD	0.3651	0.3765	0.76155	0.9521	0.06904	-
							SCZ	0.3537	0.3765	0.92495	0.906	0.06863	-
							Psychosis	0.3593	0.3765	0.8934	0.9284	0.0597	-
12	rs2070615		CACNB3	49218171	G	A	BD	0.4376	0.4337	0.40645	1.016	0.06704	+
							SCZ	0.4449	0.4337	0.24595	1.047	0.06644	+
							Psychosis	0.4413	0.4337	0.29625	1.032	0.05798	+
13	rs1323038		KCTD12	77497175	A	T	BD	0.2311	0.2006	0.98705	1.198	0.08108	-
							SCZ	0.2082	0.2006	0.7169	1.048	0.08194	-
							Psychosis	0.2195	0.2006	0.9455	1.121	0.07115	-
15	rs16966413		SPRED1	36267191	G	A	BD	0.1216	0.1221	0.5177	0.9955	0.1017	-
							SCZ	0.1259	0.1221	0.36115	1.036	0.1004	+
							Psychosis	0.1238	0.1221	0.4278	1.016	0.08785	+
15	rs12912251*		C15orf53	38986368	T	G	BD	0	0.0005574	0.495	NA	NA	NA
							SCZ	0	0.0005574	0.487	NA	NA	NA
							Psychosis	0	0.0005574	0.326	NA	NA	NA
15	rs12899449		C15orf53	38995491	G	A	BD	0.03384	0.02564	0.92685	1.331	0.1975	-
							SCZ	0.02696	0.02564	0.5984	1.053	0.2061	-
							Psychosis	0.03034	0.02564	0.836	1.189	0.1773	-
15	rs7174854		C15orf32	90844980	T	A	BD	0.1648	0.1573	0.26945	1.057	0.09049	+
							SCZ	0.1522	0.1573	0.66725	0.9613	0.09128	-
							Psychosis	0.1584	0.1573	0.4589	1.008	0.079	+
15	rs8040009		C15orf32	90845343	C	T	BD	0.1654	0.1583	0.28085	1.054	0.09036	+
							SCZ	0.1534	0.1583	0.65705	0.9639	0.09095	-
							Psychosis	0.1593	0.1583	0.4609	1.008	0.07879	+
16	rs420259		PALB2	23634026	C	T	BD	0.3699	0.3919	0.0867	0.9108	0.06866	+
							SCZ	0.3852	0.3919	0.3373	0.972	0.0677	+
							Psychosis	0.3777	0.3919	0.15455	0.9416	0.05914	+
18	rs4939921		MYO5B	45716326	C	T	BD	0.2286	0.2562	0.973395	0.8604	0.07783	-
							SCZ	0.2389	0.2562	0.88755	0.9113	0.07652	-
							Psychosis	0.2338	0.2562	0.9651	0.8861	0.06669	-
19	rs11085829		NFIX	13174312	G	A	BD	0.4001	0.39	0.26765	1.043	0.06816	+
							SCZ	0.388	0.39	0.54955	0.9916	0.06778	-
							Psychosis	0.394	0.39	0.38965	1.017	0.05907	+
19	rs1064395		NCAN	19361735	A	G	BD	0.1268	0.1237	0.39145	1.028	0.1004	+
							SCZ	0.121	0.1237	0.59905	0.9751	0.1005	-
							Psychosis	0.1239	0.1237	0.49525	1.001	0.08727	+
20	rs58401515	yes	PTPRT	41218354	C	T	BD	0.09276	0.0981	0.292	0.9399	0.1132	+
		(rs6102917)					SCZ	0.09309	0.0981	0.30245	0.9436	0.1123	+
							Psychosis	0.09292	0.0981	0.2691	0.9418	0.09749	+
	Table S2: Association analysis for all SNPs
	A1: minor allele based upon whole sample
	A2: major allele
	BD=bipolar disorder, SCZ=schizophrenia
	F_A: Frequency of affected subjects
	F_U: Frequency of unaffected subjects
	P values based upon one-tailed test
	OR=Odds ratio (A2: reference), SE=standard error
	direction: direction of the effect size based upon the original studies. +: same direction. -: opposite direction
	*:calculated by Fisher's exact test (2tailed)
